# Supplementary material
Source: MDPI journal article supplement (https://www.mdpi.com/2311-7524/8/3/268)
Supplement: s1 [file s1]

**Table S1.** Summary of the QTL regions related to silique length including linkage groups (LGs), single nucleotide polymorphism (SNP), position, logarithm of the odds (LOD)

| <b>QTL names</b> | <b>LGs</b> | <b>SNPs</b> | <b>Position in LG</b> | <b>LOD</b> |
|------------------|------------|-------------|-----------------------|------------|
| <i>qSLr4</i>     | R4         | R4_38169053 | 48.781                | 4.44       |
| <i>qSLr4</i>     | R4         | R4_38712953 | 51.308                | 5.93       |
| <i>qSLr4</i>     | R4         | R4_37067463 | 52.019                | 9.55       |
| <i>qSLr4</i>     | R4         | R0_29177721 | 53.183                | 9.59       |
| <i>qSLr4</i>     | R4         | R4_22823445 | 53.263                | 5.51       |
| <i>qSLr4</i>     | R4         | R0_29177966 | 53.775                | 6.24       |
| <i>qSLr4</i>     | R4         | R4_39930307 | 54.064                | 4.70       |
| <i>qSLr4</i>     | R4         | R4_40520291 | 55.211                | 4.41       |

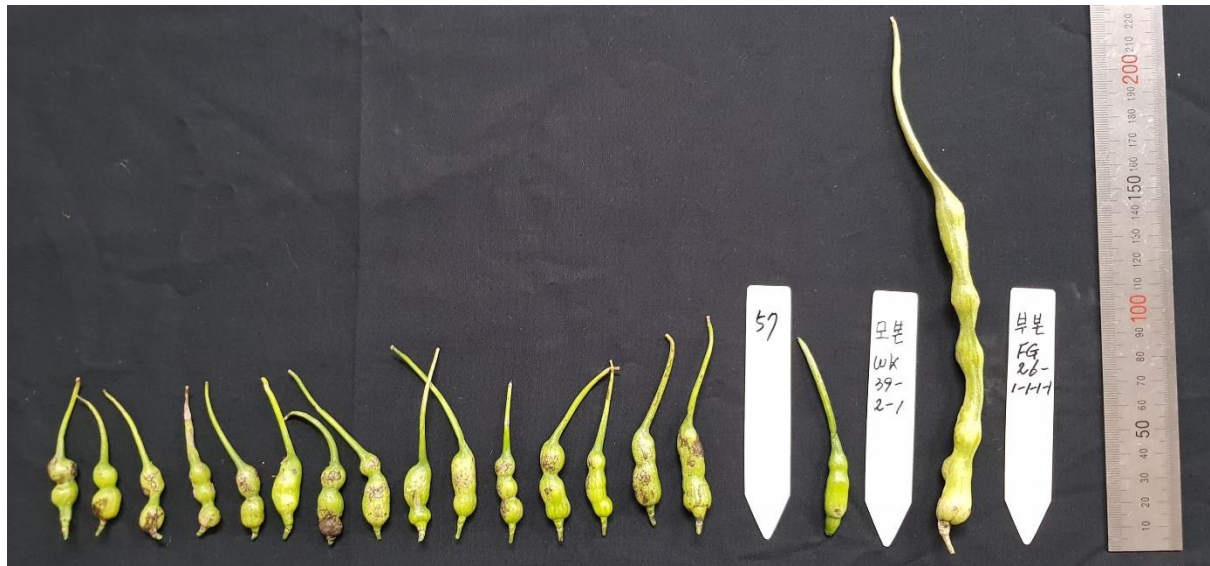

**Figure S1.** An example of phenotypic observation of silique length. From the left, two siliques from paternal and maternal lines, and 15 siliques from an F2 individual no. '52'.
